# Supplementary material for: Cembranoid-Related Metabolites and Biological Activities from the Soft Coral Sinularia flexibilis
Source: PubMed Central journal article supplement (PMC6117644; doi:10.3390/md16080278), 2018-08-09
Supplement: marinedrugs-16-00278-s001.pdf [file marinedrugs-16-00278-s001.pdf]

## Secondary Metabolites and Biological Activities from the Soft Coral *Sinularia flexibilis*

Chia-Hua Wu<sup>1,†</sup>, Chao, Chih-Hua<sup>2,3,†</sup>, Tzu-Zin Huang<sup>1,†</sup>, Chiung-Yao Huang<sup>1</sup>, Tsong-Long Hwang<sup>4</sup>, Chang-Feng Dai<sup>5</sup> and Jyh-Horng Sheu<sup>1,6,7,8,\*</sup>

<sup>1</sup> Department of Marine Biotechnology and Resources, National Sun Yat-sen University, Kaohsiung 804, Taiwan; cathywu7979@gmail.com(C.-H.W.)slime112229@gmail.com (T.-Z.H.); huangcy@mail.nsysu.edu.tw (C.-Y.H.);

<sup>2</sup> School of Pharmacy, China Medical University, Taichung 404, Taiwan; chchao@mail.cmu.edu.tw

<sup>3</sup> Chinese Medicine Research and Development Center, China Medical University Hospital, Taichung 404, Taiwan; chchao@mail.cmu.edu.tw

<sup>4</sup> Graduate Institute of Natural Products, College of Medicine, Chang Gung University; Research Center for Industry of Human Ecology and Graduate Institute of Health Industry Technology, Chang Gung University of Science and Technology; Department of Anesthesiology, Chang Gung Memorial Hospital, Taoyuan 333, Taiwan; htl@mail.cgu.edu.tw (T.-L.H.)

<sup>5</sup> Institute of Oceanography, National Taiwan University, Taipei 112, Taiwan; corallab@ntu.edu.tw (C.-F.D.)

<sup>6</sup> Institute of Natural Products, Kaohsiung Medical University, Kaohsiung 807, Taiwan

<sup>7</sup> Department of Medical Research, China Medical University Hospital, China Medical University, Taichung 404, Taiwan

<sup>8</sup> Frontier Center for Ocean Science and Technology, National Sun Yat-sen University, Kaohsiung 804, Taiwan

\*Correspondence: sheu@mail.nsysu.edu.tw; Tel: +886-7-5252000 (ext. 5030); Fax: +886-7-5255020

<sup>†</sup> These authors contributed equally to this work

\*To whom correspondence should be addressed. Tel.: 886-7-5252000 ext. 5030, Fax: 886-7-5255020. E-mail: sheu@mail.nsysu.edu.tw

| No          | Content                                                                                                          | Page |
|-------------|------------------------------------------------------------------------------------------------------------------|------|
| Figure S1.  | $^1\text{H}$ NMR spectrum (500 MHz) of compound <b>1</b> in $\text{CDCl}_3$ .                                    | 3    |
| Figure S2.  | $^{13}\text{C}$ NMR spectrum (100 MHz) of compound <b>1</b> in $\text{CDCl}_3$ .                                 | 4    |
| Figure S3.  | $^1\text{H}$ NMR spectrum (500 MHz) of compound <b>2</b> in $\text{CDCl}_3$ .                                    | 5    |
| Figure S4.  | $^1\text{H}$ NMR spectrum (400 MHz) of compound <b>2</b> and hydrolyzed product of <b>7</b> in $\text{CDCl}_3$ . | 6    |
| Figure S5.  | $^{13}\text{C}$ NMR spectrum (100 MHz) of compound <b>2</b> in $\text{CDCl}_3$ .                                 | 7    |
| Figure S6.  | $^1\text{H}$ NMR spectrum (500 MHz) of compound <b>3</b> in $\text{CDCl}_3$ .                                    | 8    |
| Figure S7.  | $^1\text{H}$ NMR spectrum (500 MHz) of compound <b>3</b> in Pyridine.                                            | 9    |
| Figure S8.  | $^{13}\text{C}$ NMR spectrum (100 MHz) of compound <b>3</b> in $\text{CDCl}_3$ .                                 | 10   |
| Figure S9.  | $^1\text{H}$ - $^1\text{H}$ COSY spectrum of <b>3</b> in Pyridine.                                               | 11   |
| Figure S10. | $^1\text{H}$ NMR spectrum (500 MHz) of compound <b>4</b> in $\text{C}_6\text{D}_6$ .                             | 12   |
| Figure S11. | $^{13}\text{C}$ NMR spectrum (100 MHz) of compound <b>4</b> in $\text{C}_6\text{D}_6$ .                          | 13   |
| Figure S12. | $^1\text{H}$ NMR spectrum (500 MHz) of compound <b>5</b> in $\text{CDCl}_3$ .                                    | 14   |
| Figure S13. | $^{13}\text{C}$ NMR spectrum (100 MHz) of compound <b>5</b> in $\text{CDCl}_3$ .                                 | 15   |

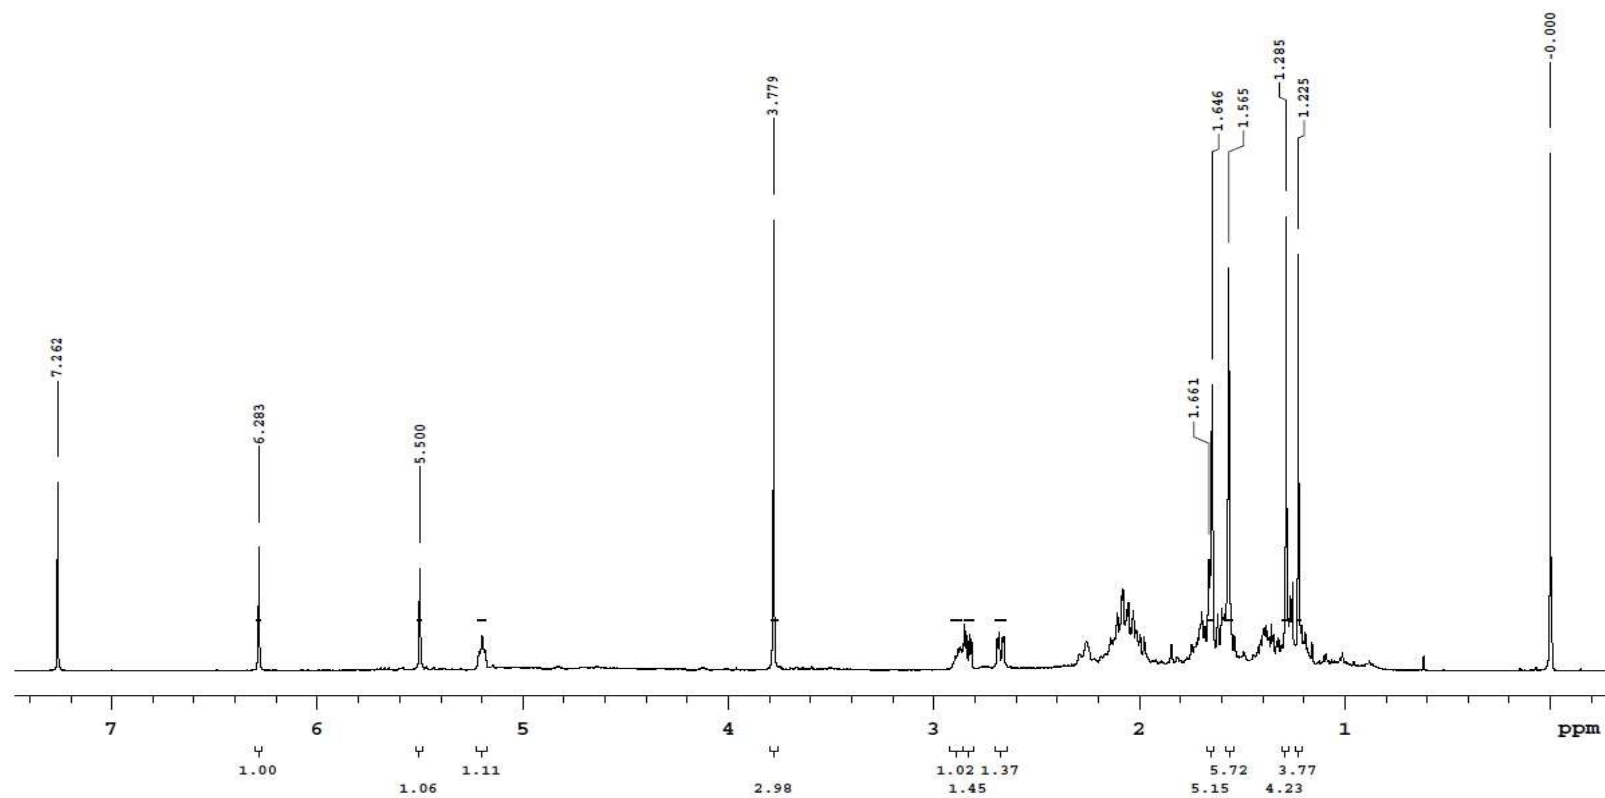

Figure S1.  $^1\text{H}$  NMR spectrum (500 MHz) of compound **1** in  $\text{CDCl}_3$ .

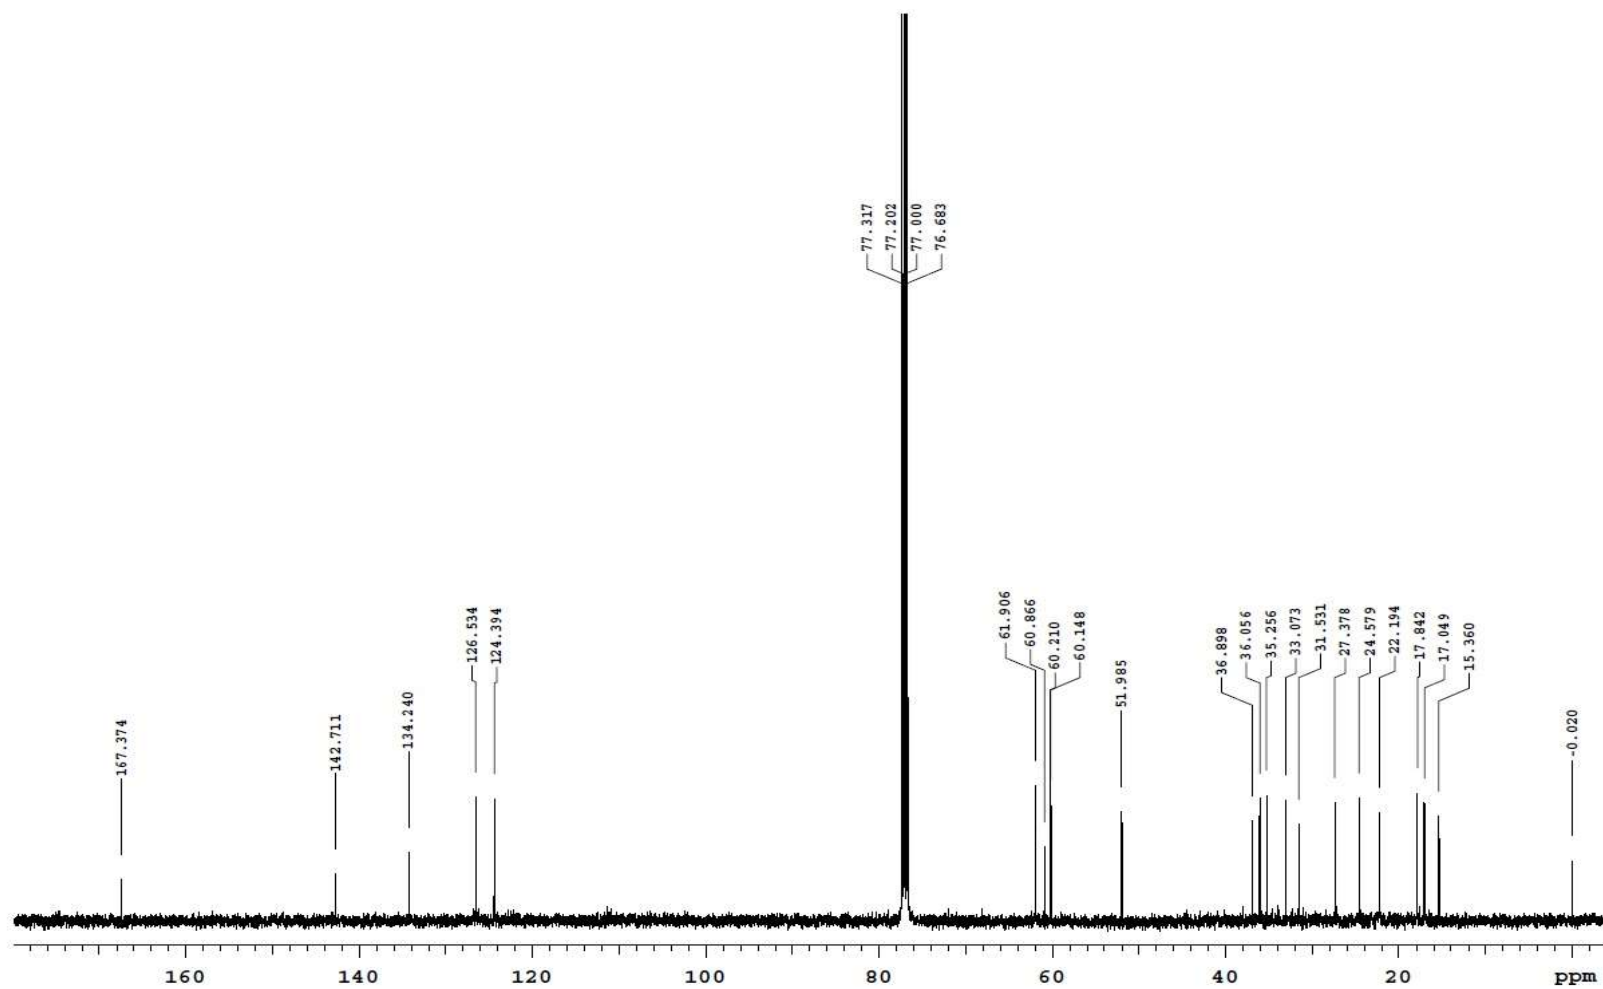

Figure S2.  $^{13}\text{C}$  NMR spectrum (100 MHz) of compound **1** in  $\text{CDCl}_3$ .

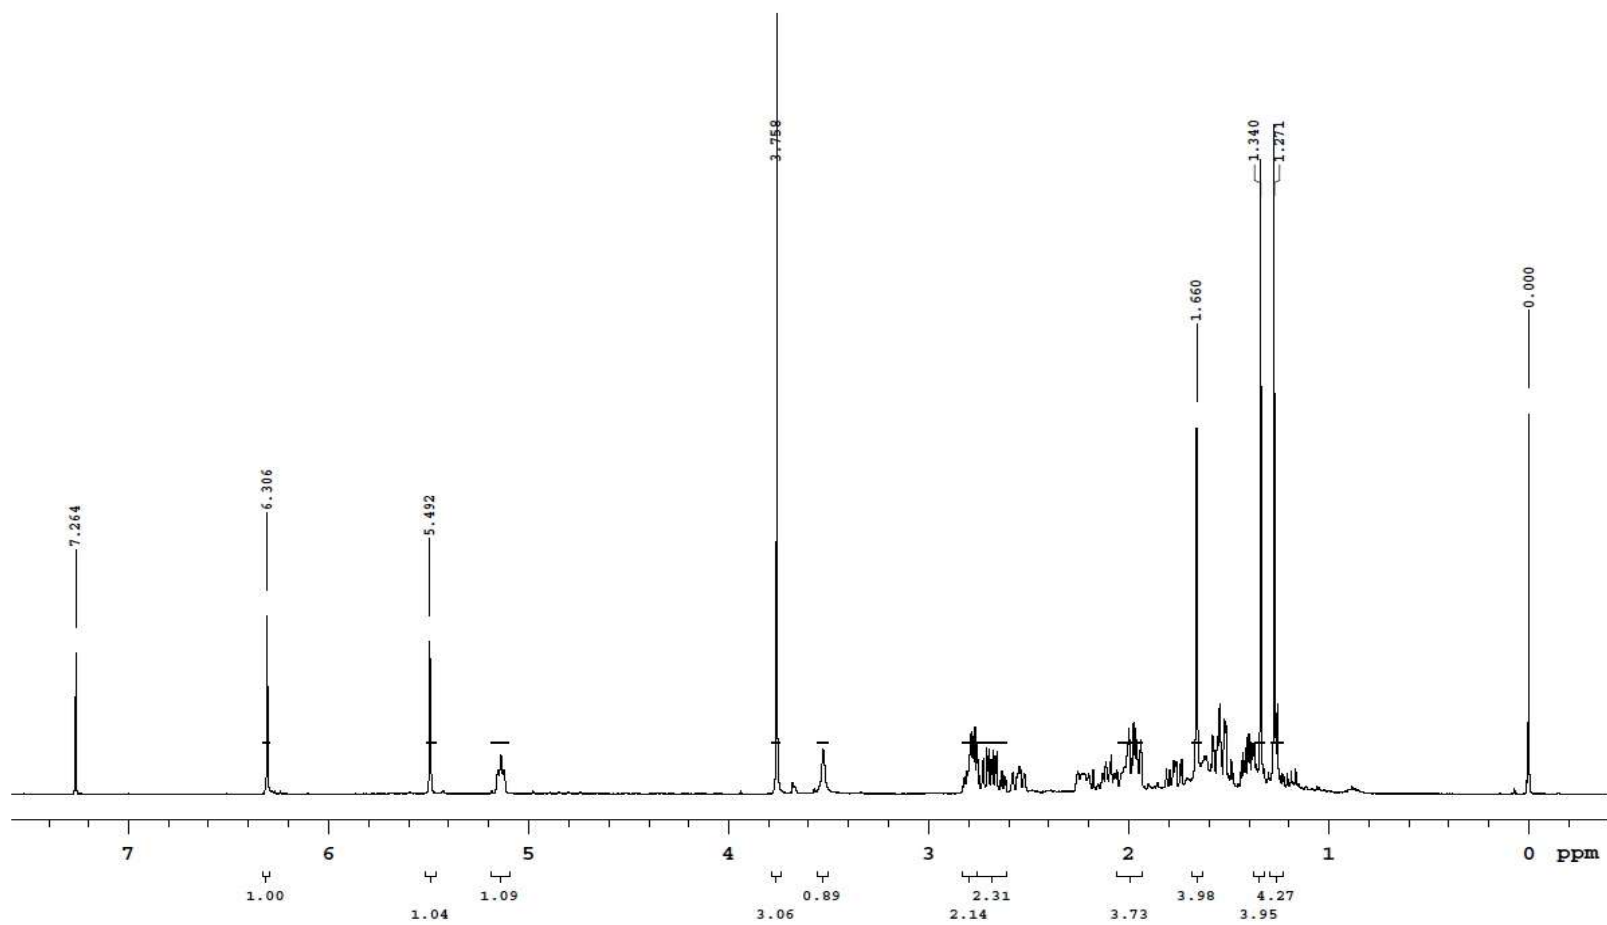

Figure S3. <sup>1</sup>H NMR spectrum (500 MHz) of compound 2 in CDCl<sub>3</sub>.

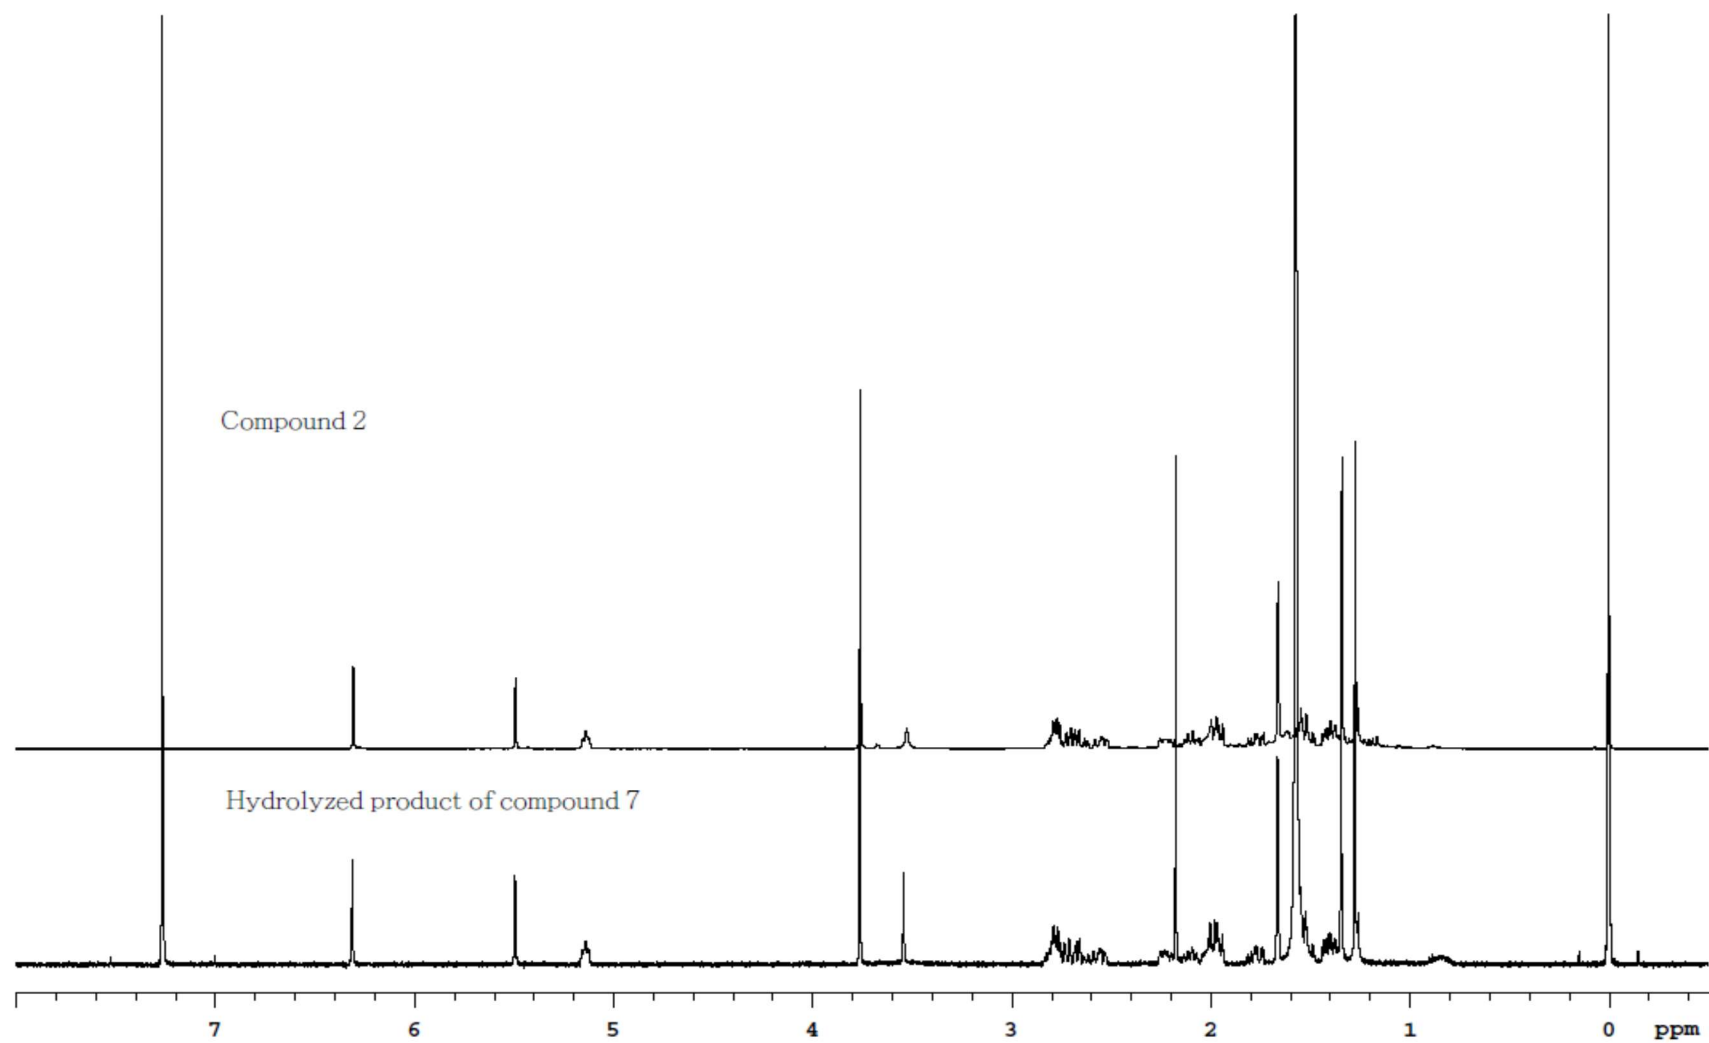

Figure S4. <sup>1</sup>H NMR spectrum (400 MHz) of compound **2** and hydrolyzed product of **7** in CDCl<sub>3</sub>.

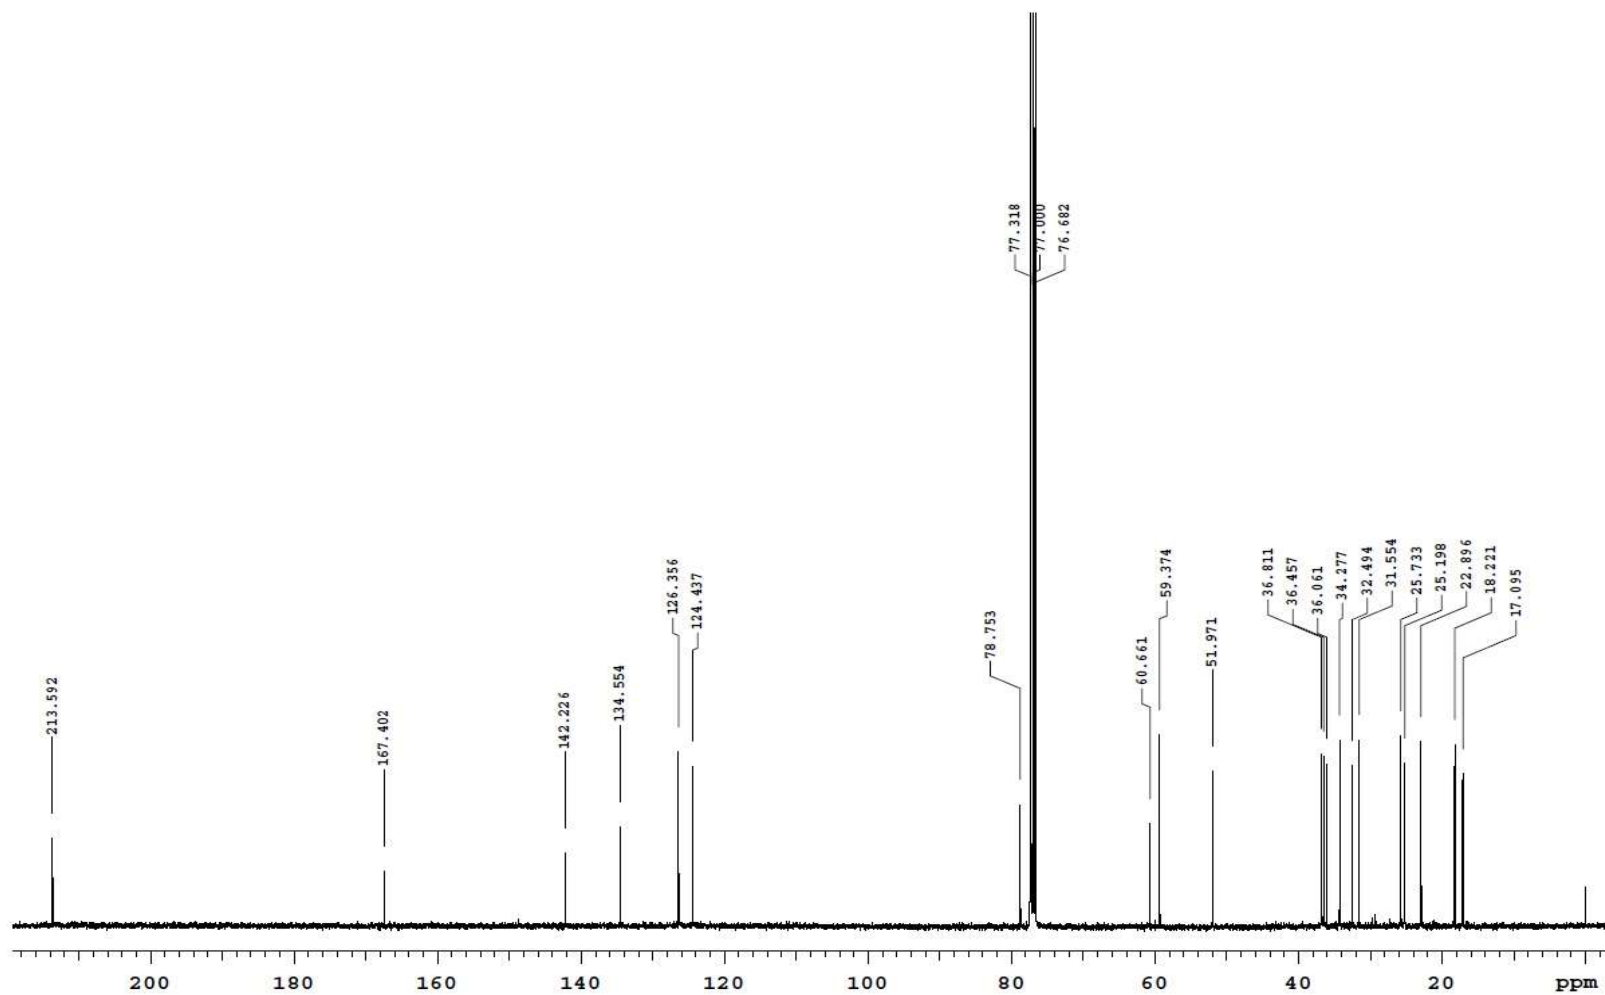

Figure S5. <sup>13</sup>C NMR spectrum (100 MHz) of compound **2** in CDCl<sub>3</sub>.

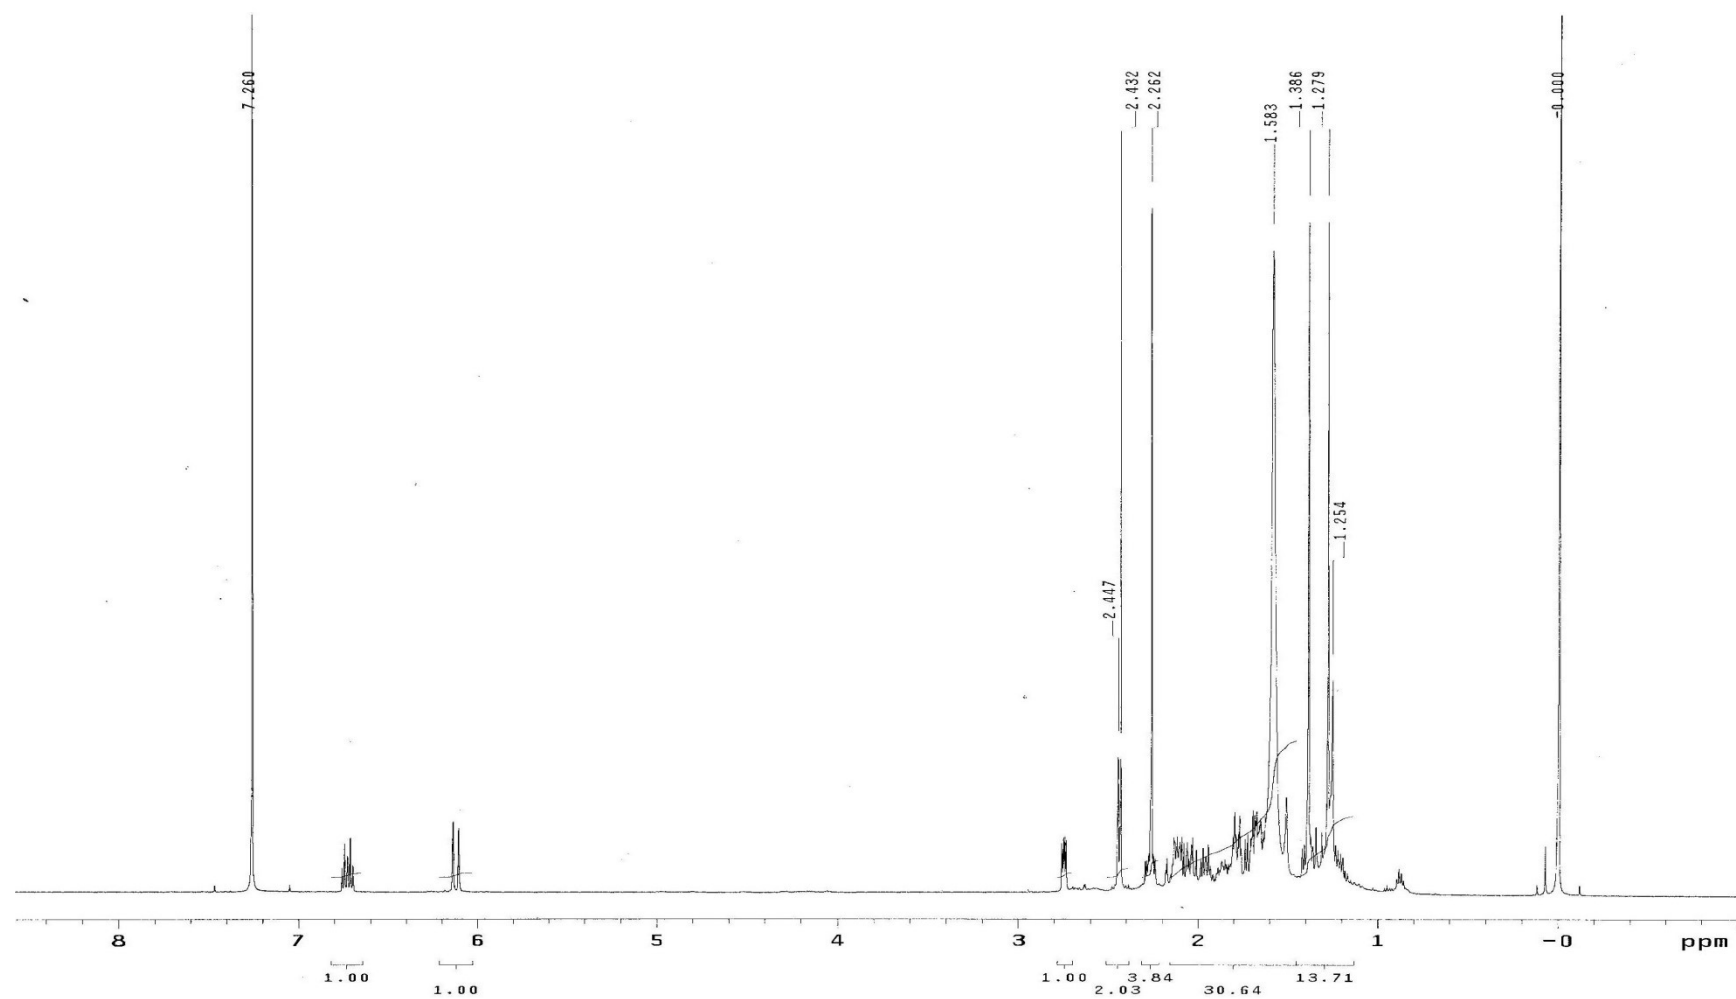

Figure S6.  $^1\text{H}$  NMR spectrum (500 MHz) of compound **3** in  $\text{CDCl}_3$ .



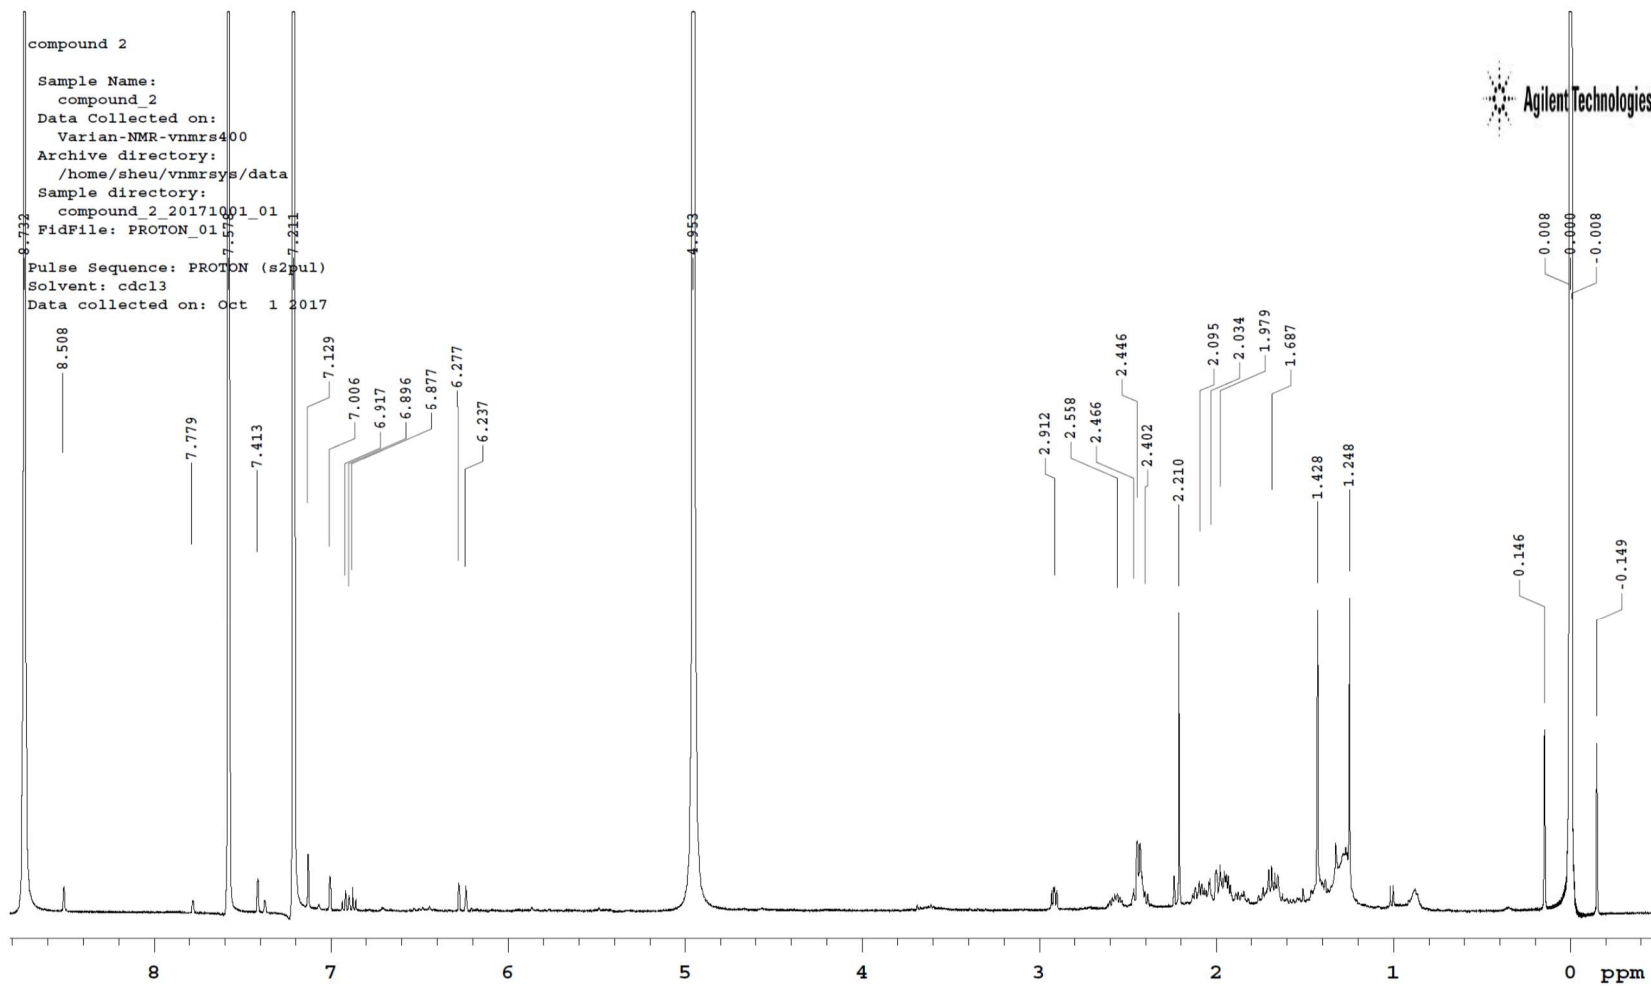

Figure S7.  $^1\text{H}$  NMR spectrum (500 MHz) of compound **3** in Pyridine.

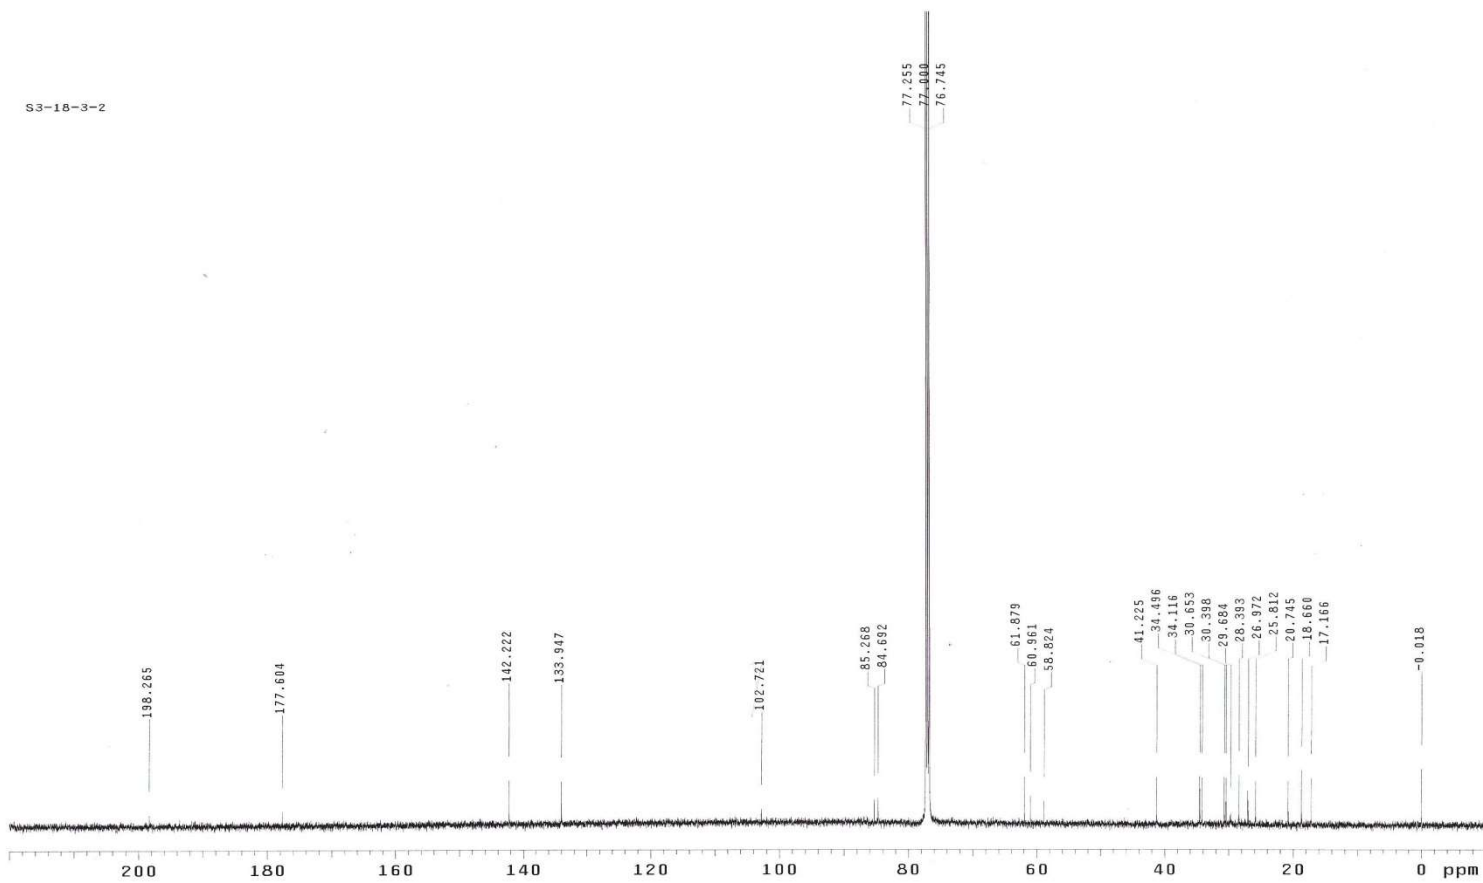

Figure S8.  $^{13}\text{C}$  NMR spectrum (100 MHz) of compound **3** in  $\text{CDCl}_3$ .

compound 2

Sample Name:  
compound\_2  
Data Collected on:  
Varian-NMR-vmr400  
Archive directory:  
/home/sheu/vnmrsys/data  
Sample directory:  
compound\_2\_20170929\_01  
FidFile: gCOSY\_01

Pulse Sequence: gCOSY  
Solvent: cdcl3  
Data collected on: Sep 29 2017

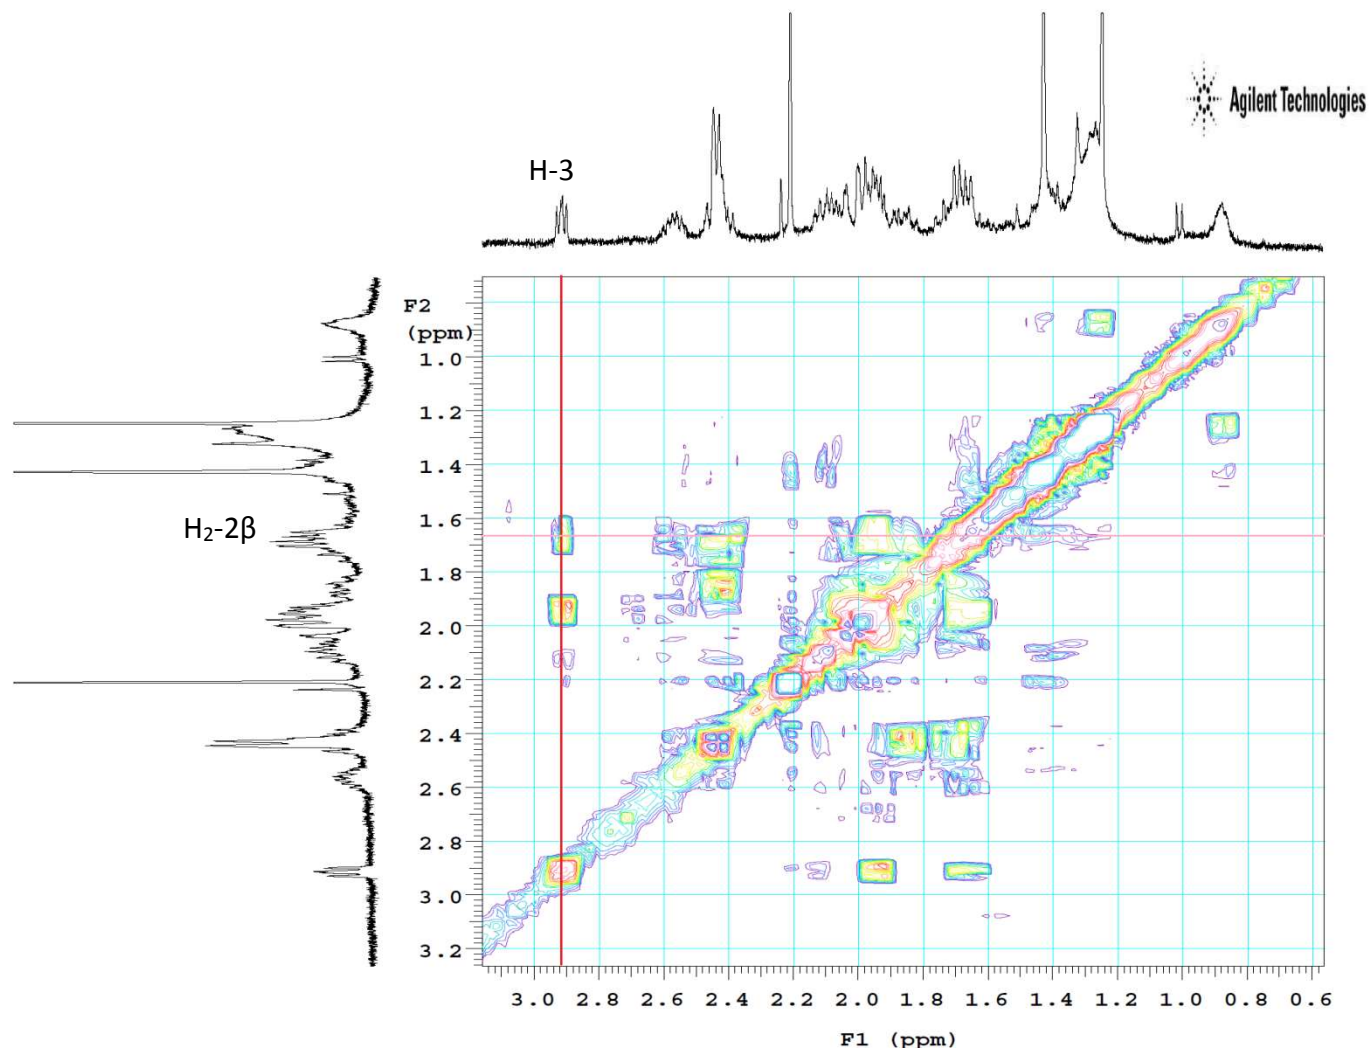

Figure S9.  $^1\text{H}$ - $^1\text{H}$  COSY spectrum of **3** in Pyridine.

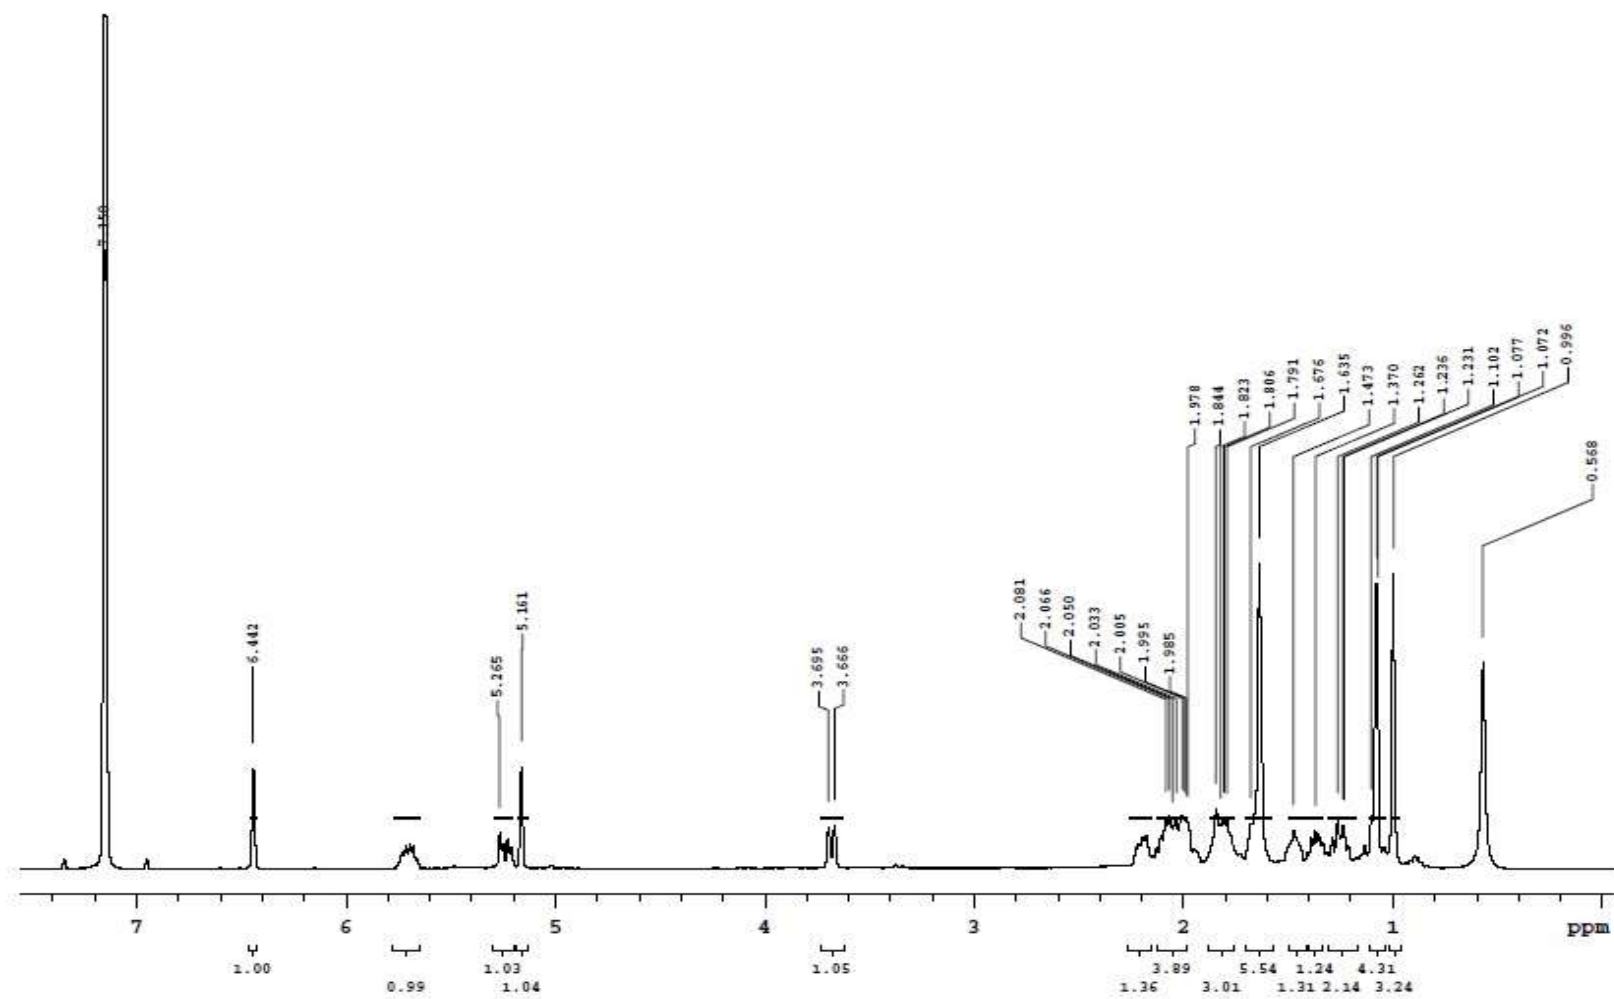

Figure S10.  $^1\text{H}$  NMR spectrum (500 MHz) of compound **4** in  $\text{C}_6\text{D}_6$ .

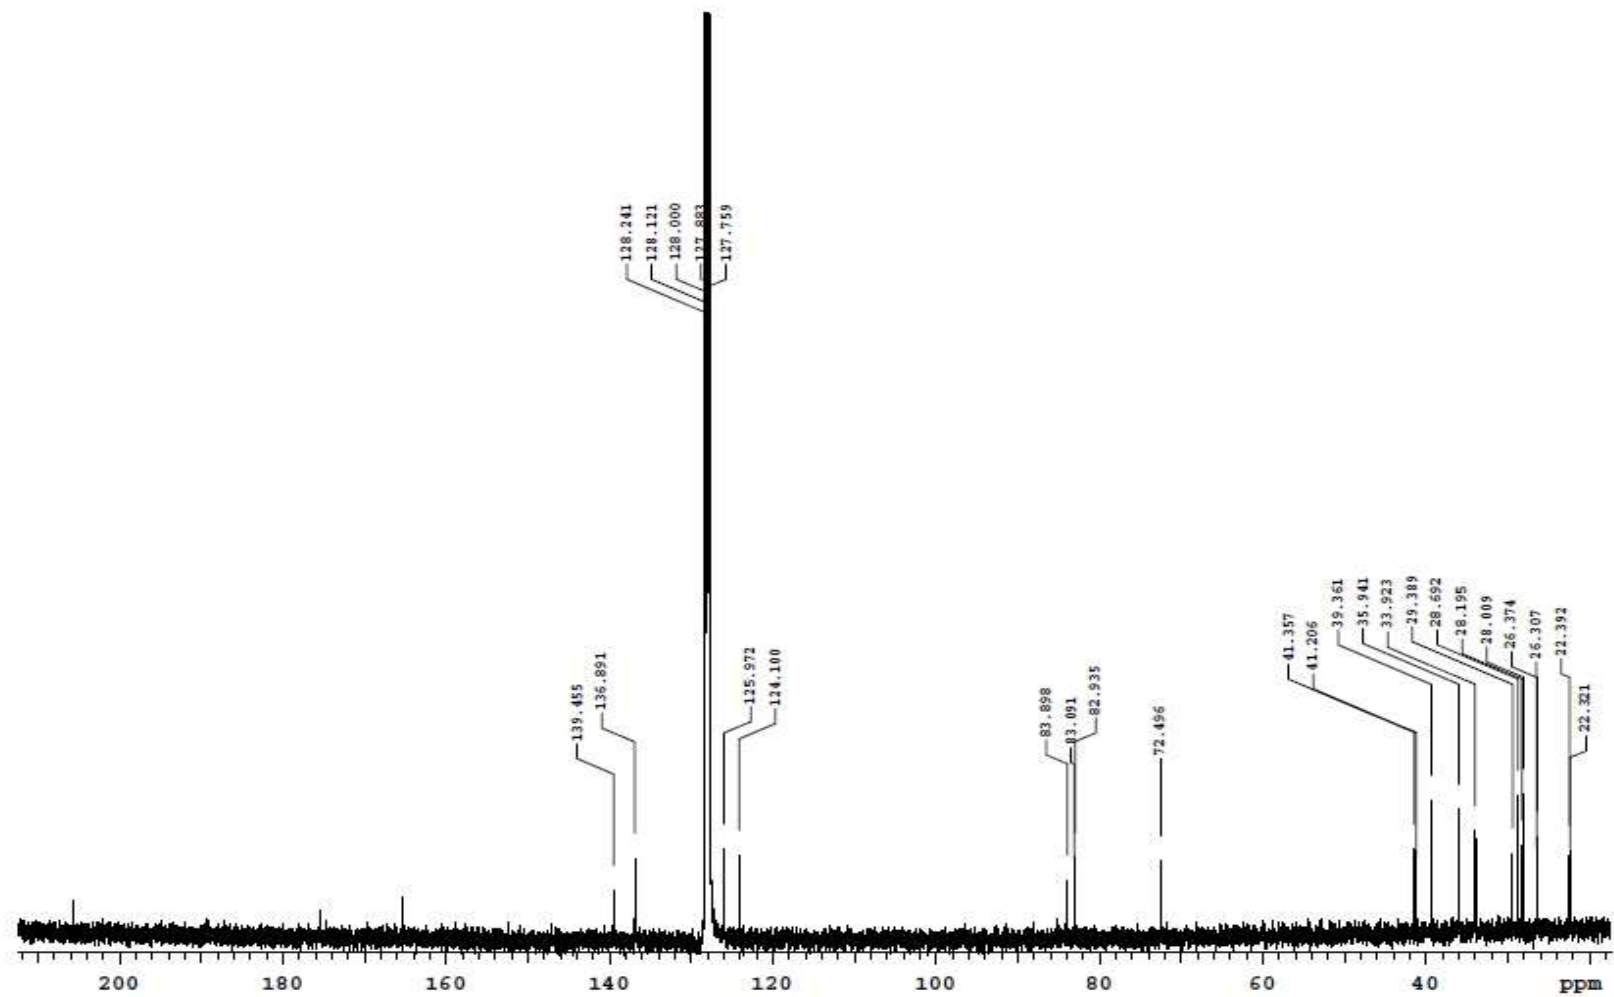

Figure S11.  $^{13}\text{C}$  NMR spectrum (100 MHz) of compound **4** in  $\text{C}_6\text{D}_6$ .

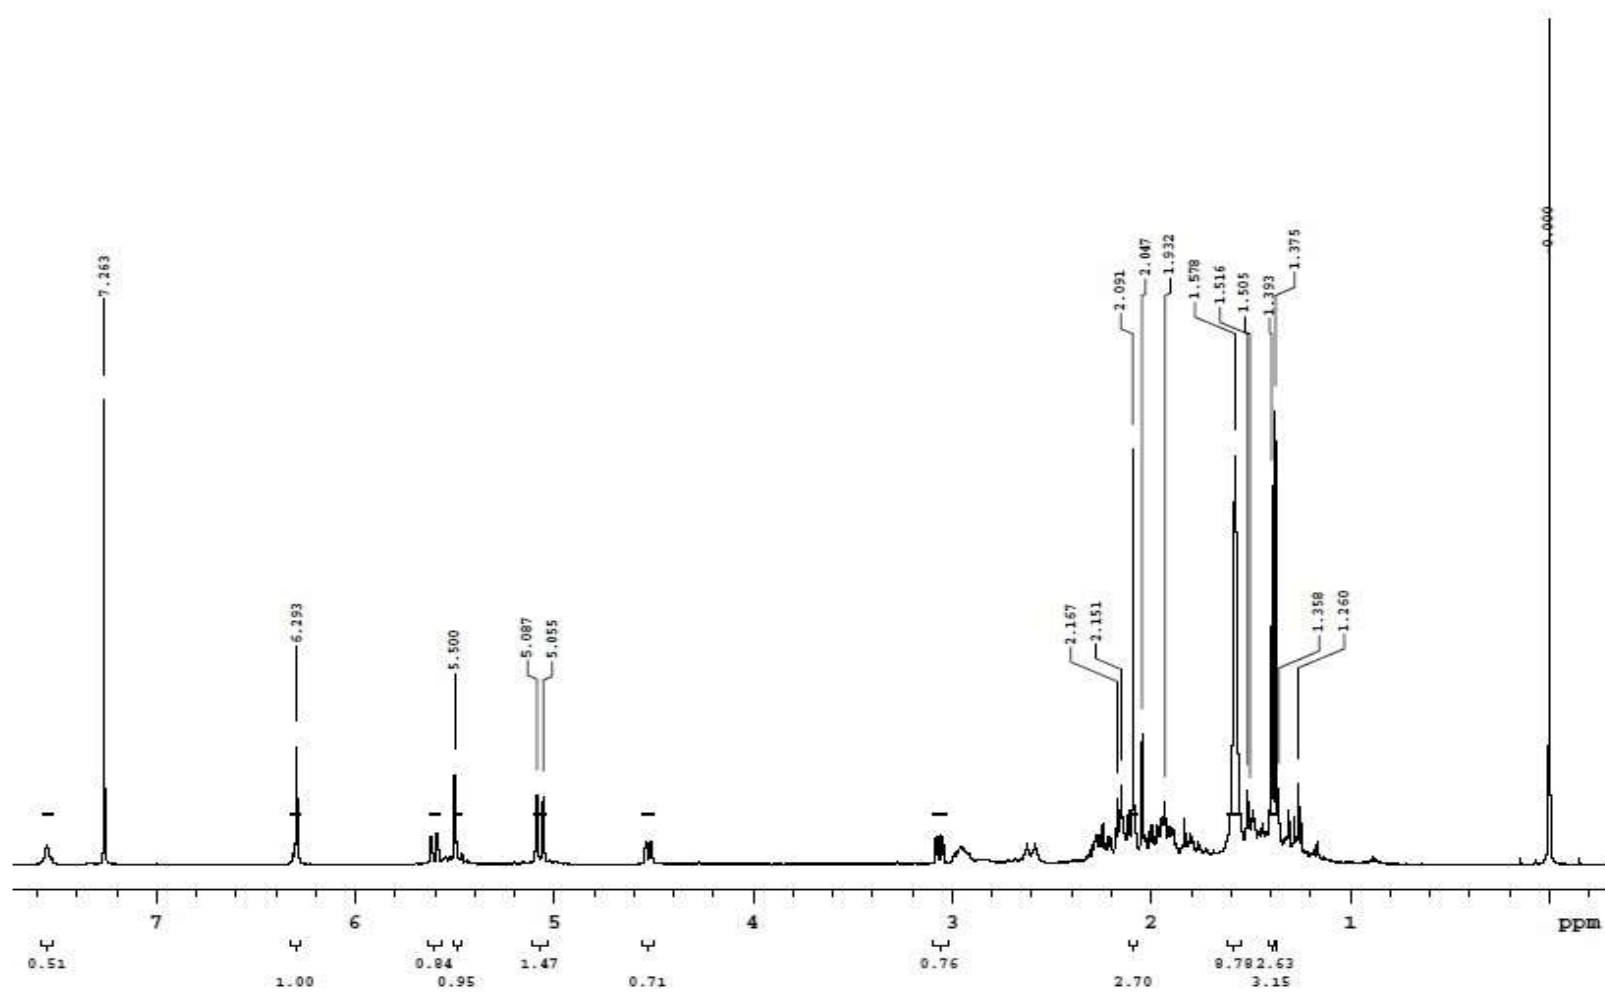

Figure S12. <sup>1</sup>H NMR spectrum (500 MHz) of compound **5** in CDCl<sub>3</sub>.

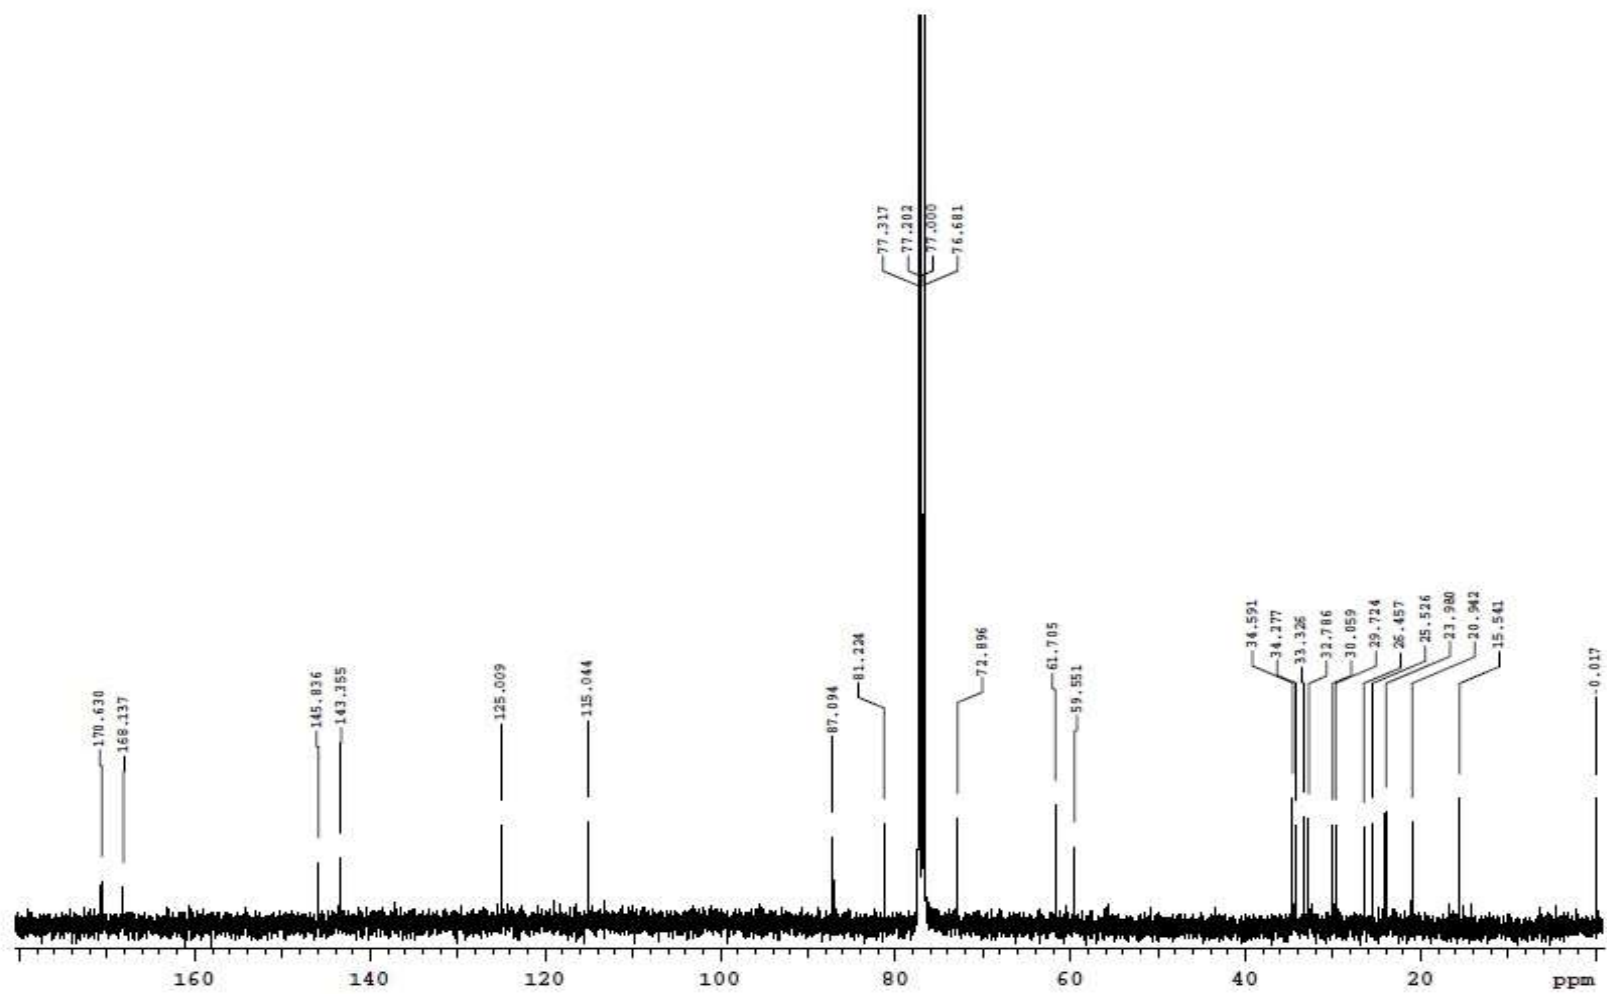

Figure S13.  $^{13}\text{C}$  NMR spectrum (100 MHz) of compound **5** in  $\text{CDCl}_3$ .
